# Supplementary material for: Genetic evidence for differential selection of grain and embryo weight during wheat evolution under domestication
Source: PubMed Central journal article supplement (PMC4566971; doi:10.1093/jxb/erv249), 2015-05-27
Supplement: supp_erv249_jexbot146563_file001.pdf [file supp_erv249_jexbot146563_file001.pdf]

**A Genetic Evidence for Differential Selection of Grain and Embryo Weight  
during Wheat Evolution under Domestication**

**Supplementary Figures and Tables**

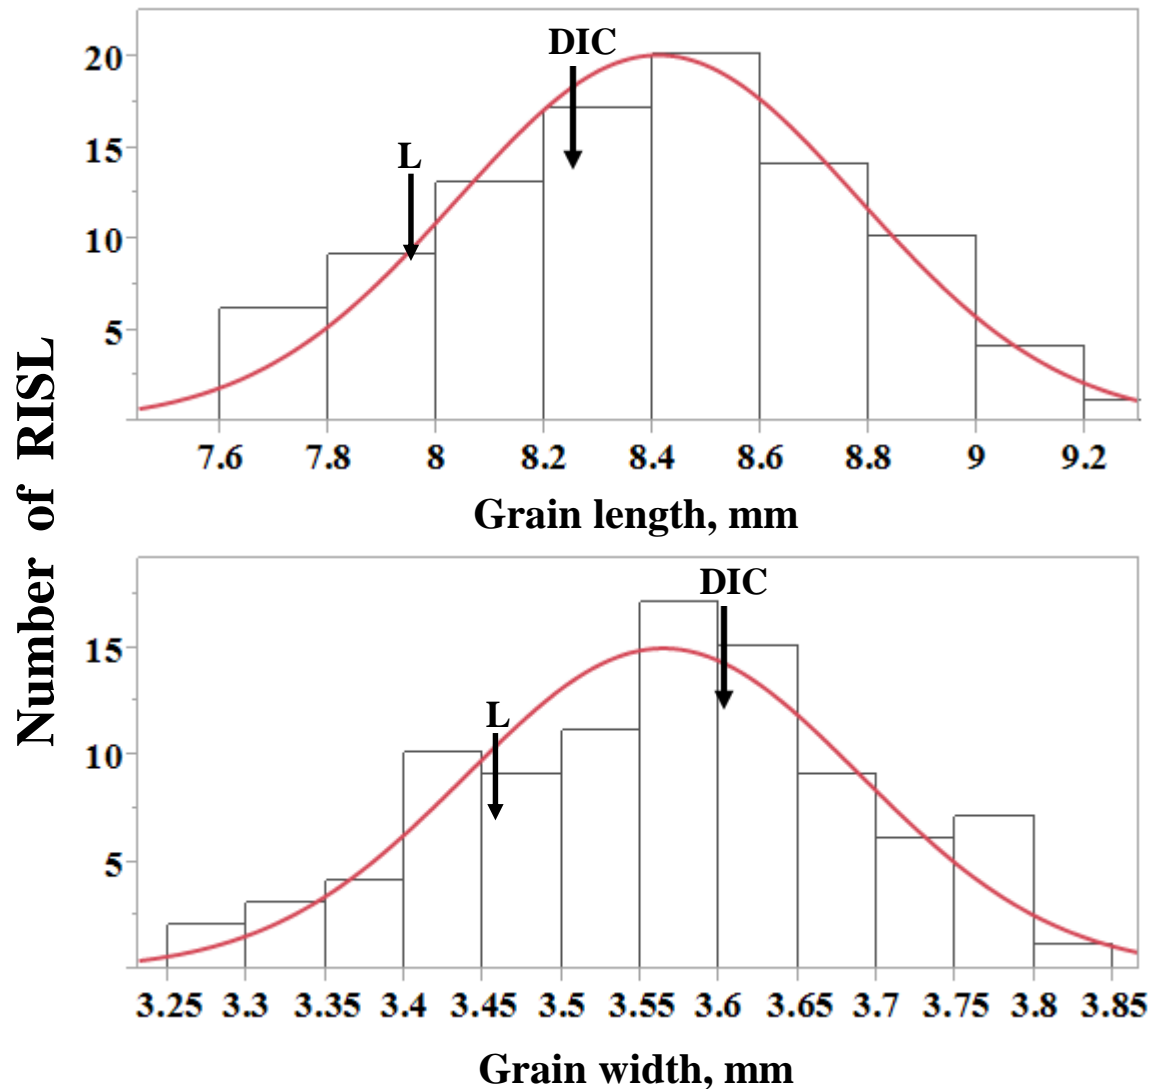

**Supplementary Figure S1.** Frequency distribution of grain shape parameters among the 94 RISLs. Arrows indicate the mean value for the two parental lines: Langdon (L) and DIC-2A (DIC).

## Supplementary Table S1. List of wild emmer accessions and durum cultivars used in this study.

|                              | Species                                    | Genotype  | Origin |
|------------------------------|--------------------------------------------|-----------|--------|
| <b>Wild emmer accessions</b> |                                            |           |        |
|                              | <i>T. turgidum</i> ssp. <i>dicoccoides</i> | J28       | Jordan |
|                              | <i>T. turgidum</i> ssp. <i>dicoccoides</i> | 12-3      | Israel |
|                              | <i>T. turgidum</i> ssp. <i>dicoccoides</i> | 28-6      | Israel |
|                              | <i>T. turgidum</i> ssp. <i>dicoccoides</i> | 13-B-53   | Israel |
|                              | <i>T. turgidum</i> ssp. <i>dicoccoides</i> | 16-34     | Israel |
|                              | <i>T. turgidum</i> ssp. <i>dicoccoides</i> | 24-39     | Israel |
|                              | <i>T. turgidum</i> ssp. <i>dicoccoides</i> | dic47     | Israel |
|                              | <i>T. turgidum</i> ssp. <i>dicoccoides</i> | dic52     | Israel |
|                              | <i>T. turgidum</i> ssp. <i>dicoccoides</i> | MM 1/1    | Israel |
|                              | <i>T. turgidum</i> ssp. <i>dicoccoides</i> | MM 5/3    | Israel |
|                              | <i>T. turgidum</i> ssp. <i>dicoccoides</i> | dic110    | Turkey |
|                              | <i>T. turgidum</i> ssp. <i>dicoccoides</i> | dic55     | Turkey |
| <b>Durum cultivars</b>       |                                            |           |        |
|                              | <i>T. turgidum</i> ssp. <i>durum</i>       | C-43      | Israel |
|                              | <i>T. turgidum</i> ssp. <i>durum</i>       | C-61      | Israel |
|                              | <i>T. turgidum</i> ssp. <i>durum</i>       | C-9       | Israel |
|                              | <i>T. turgidum</i> ssp. <i>durum</i>       | P9        | Israel |
|                              | <i>T. turgidum</i> ssp. <i>durum</i>       | Eliav     | Israel |
|                              | <i>T. turgidum</i> ssp. <i>durum</i>       | Givati    | Israel |
|                              | <i>T. turgidum</i> ssp. <i>durum</i>       | Inbar     | Israel |
|                              | <i>T. turgidum</i> ssp. <i>durum</i>       | Svevo     | Italy  |
|                              | <i>T. turgidum</i> ssp. <i>durum</i>       | Uzan      | Israel |
|                              | <i>T. turgidum</i> ssp. <i>durum</i>       | Kizilitan | Turkey |
|                              | <i>T. turgidum</i> ssp. <i>durum</i>       | Kofa      | USA    |
|                              | <i>T. turgidum</i> ssp. <i>durum</i>       | UC 1113   | USA    |

**Supplementary Table S2.** List of primers that were developed for the current study.

| Primer           | Primer sequence        | Corresponding GenBank accession | Polymorphism | Amplicon length |
|------------------|------------------------|---------------------------------|--------------|-----------------|
| <i>Xhuj001_F</i> | AGCGTCTTAGTACCCTGCTTG  | AK331946.1                      | Indel        | 177             |
| <i>Xhuj001_R</i> | CGTGTTGGCCATGCATAAAAC  |                                 |              |                 |
| <i>Xhuj002_F</i> | CTACCAAATGTGATGCCCGG   | AK335551.1                      | Indel        | 177             |
| <i>Xhuj002_R</i> | GGGAAGTCAAGCGTGTCTGA   |                                 |              |                 |
| <i>Xhuj003_F</i> | CCTCCTGACTCCTCCCTAAA   | BE497494.1                      | SNP          | 324             |
| <i>Xhuj003_R</i> | TGGTAAACCAAAGGTGATAACG |                                 |              |                 |
| <i>Xhuj004_F</i> | CCGAGTTTACCCCATACCAAT  | M94726.1                        | Indel        | 1066            |
| <i>Xhuj004_R</i> | TGGTAAGATTTTGTATCGCATT |                                 |              |                 |

**Supplementary Table S3.** Correlation values (r) among grain and embryo traits measured in RISL population.

|               | Grain weight | Grain length | Grain width |
|---------------|--------------|--------------|-------------|
| Grain length  | 0.72****     |              |             |
| Grain width   | 0.83****     | 0.68****     |             |
| Embryo weight | 0.56****     | 0.33**       | 0.55****    |

\*\* and \*\*\*\* indicate significant correlation between traits at  $P < 0.01$  and  $P < 0.0001$ , respectively.

**Supplementary Table S4.** Biometric parameters of QTLs affecting grain and embryo parameters in RISL population.

| <b>Trait</b>         | <b>Position (cM)</b> | <b>Nearest marker</b> | <b>LOD<sup>a</sup></b> | <b>P.E.V%<sup>b</sup></b> | <b>d<sup>c</sup></b> | <b>Favorable allele<sup>d</sup></b> |
|----------------------|----------------------|-----------------------|------------------------|---------------------------|----------------------|-------------------------------------|
| <b>Grain weight</b>  | 57.8±3.15            | <i>Xhbg494</i>        | 12.81***               | 0.481                     | 5.741±0.654          | Dic                                 |
| <b>Embryo weight</b> | 47.97±5.21           | <i>Xbarc201</i>       | 7.7***                 | 0.318                     | 0.06±0.009           | Dic                                 |
| <b>Grain length</b>  | 62.38±0.97           | <i>Xcfa2043</i>       | 12.45***               | 0.456                     | 0.498±0.056          | Dic                                 |
| <b>Grain width</b>   | 56.40±4.65           | <i>Xwmc794</i>        | 9.75***                | 0.382                     | 0.154±0.02           | Dic                                 |

\*\*\* indicate significance at  $P < 0.001$ .

<sup>a</sup> LOD scores that were found to be significant when comparing hypotheses  $H_1$  (there is a QTL in the chromosome) and  $H_0$  (no effect of the chromosome on the trait), using the 1000 permutation test (Churchill and Doerge, 1994).

<sup>b</sup> Proportion of explained variance of the trait.

<sup>c</sup> The additive effect of an allele calculated as one-half of the mean difference between homozygotes with and without the allele.

<sup>d</sup> Favorable parental allele contributing to higher values; Langdon (L) and DIC-2A (DIC).

**Supplementary Table S5.** Dry weight of selected RISL seedlings with different grain-weight (GW) and embryo-weight (EmW) alleles of domesticated (LDN) and wild emmer (DIC) wheat.

| <b>RISL</b>   | <b>Grain</b> | <b>Embryo</b> | <b>Mean±SD (mg)</b> |
|---------------|--------------|---------------|---------------------|
| <b>LDN</b>    | LDN          | LDN           | 77.75±1.92          |
| <b>59</b>     | LDN          | LDN           | 86.62±5.48          |
| <b>45</b>     | LDN          | DIC           | 106.27±6.21         |
| <b>69</b>     | LDN          | DIC           | 96.49±9.36          |
| <b>84</b>     | LDN          | DIC           | 94.03±9.70          |
| <b>58</b>     | DIC          | LDN           | 85.00±15.51         |
| <b>64</b>     | DIC          | LDN           | 74.54±10.35         |
| <b>85</b>     | DIC          | LDN           | 74.17±7.77          |
| <b>1</b>      | DIC          | DIC           | 98.45±7.70          |
| <b>90</b>     | DIC          | DIC           | 98.45±11.35         |
| <b>DIC-2A</b> | DIC          | DIC           | 86.98±9.34          |
